# Supplementary material for: Hole-transport-layer-free CdSe/ZnS core/shell red quantum-dot light-emitting diodes sensitized by TADF polymers
Source: Royal Society of Chemistry journal article supplement (doi:10.1039/d3qm00130j), 2023-01-01
Supplement: d3qm00130j1.pdf [file d3qm00130j1.pdf]

## Supporting Information

### Hole-transport-layer-free CdSe/ZnS core/shell red quantum-dot light-emitting diodes sensitized by TADF polymer

Yuhan Gao,<sup>a,b</sup> Qin Xue\*<sup>c</sup> and Guohua Xie\*<sup>a,b</sup>

<sup>a</sup>The Institute of Flexible Electronics (Future Technologies), Xiamen University, Xiamen 361005, China

<sup>b</sup>Sauvage Center for Molecular Sciences, Hubei Key Lab on Organic and Polymeric Optoelectronic Materials, Department of Chemistry, Wuhan University, Wuhan, 430072, China.

<sup>c</sup>Department of Physical Science and Technology, Central China Normal University, Wuhan 430079, China.

\*Corresponding email addresses: xueqin@mail.ccnu.edu.cn (Q.X.) and guohua.xie@whu.edu.cn (G.X.).

#### Materials

Poly(3,4-ethylenedioxythiophene):poly(styrene sulfonate) (PEDOT:PSS) (Heraeus Clevios P VP AI 4083) was used as hole injecting layer, and the solution was purchased from Xi'an Polymer Light Technology Corporation. The modified PEDOT:PSS was prepared according to the previous work by our group[18, 20]. Poly[bis(4-phenyl)(2,4,6-trimethylphenyl)amine (PTAA) was used as hole transporting layer. The host materials 1,3-bis(carbazol-9-yl)benzene (mCP) and 10,10'-(4,4'-Sulfonylbis(4,1-phenylene))bis(9,9-dimethyl-9,10-dihydroacridine (DMAC-DPS) were purchased from Luminescence Technology Corporation. Bis-[3-(9,9-dimethyl-9,10-dihydroacridine)-phenyl]-sulfone (m-ACSO<sub>2</sub>) was synthesized by our group. The

TADF polymer PCzAQC0.5 was synthesized according to literature[1]. 8-hydroxyquinolinolate (Liq), and 1,3,5-tri(m-pyrid-3-yl-phenyl)benzene (TmPyPB), and bis[2-(diphenylphosphino)phenyl]ether oxide (DPEPO) were used as purchased without further purification.

### **Device fabrication and characterization**

The indium tin oxide (ITO) substrates were cleaned with acetone and ethanol consecutively for 10 minutes in the ultrasonic bath. After being dried by N<sub>2</sub>, the substrates were treated with UV-ozone for 20 minutes to form a hydrophilic surface. The modified PEDOT:PSS layer were obtained by spin-coating from the aqueous solution on the ITO substrate at 4000 rpm for 30s. Then the substrates were transferred to a glovebox to conduct a thermal annealing at 120 °C for 10 minutes. After these steps, the quantum-dot-based emitting layers were spin-coated from the toluene solution at 1000 rpm for 30s, followed with an annealing process at 50 °C for 10 minutes. DPEPO, TmPyPB, Liq, and Al were thermally deposited in a vacuum chamber, sequentially. After encapsulation with UV epoxy, all the devices were tested at ambient air. The voltage-current-luminance characteristics and the EL spectra were simultaneously measured with PR735 SpectraScan Photometer and Keithley 2400 sourcemeter unit under ambient atmosphere at room temperature.

Table S1. Comparison of the electroluminescent performances of the devices.

| EML       | HTL      | EQE <sup>a</sup><br>(%) | CE <sub>max</sub> <sup>b</sup><br>(cd/A) | PE <sub>max</sub> <sup>c</sup><br>(lm/W) | FWHM <sup>d</sup><br>(nm) | λ <sub>max</sub> <sup>e</sup><br>(nm) | CIE <sup>f</sup><br>(x,y) | Color<br>purity <sup>g</sup> (%) |
|-----------|----------|-------------------------|------------------------------------------|------------------------------------------|---------------------------|---------------------------------------|---------------------------|----------------------------------|
| Non-doped | HTL-Free | N.A. <sup>i</sup>       | N.A.                                     | N.A.                                     | N.A.                      | N.A.                                  | N.A.                      | N.A.                             |
| doped     | HTL-Free | 12.4                    | 15.9                                     | 5.6                                      | 36                        | 620                                   | (0.65, 0.35)              | 95.9                             |
| doped     | PTAA     | 6.1                     | 7.6                                      | 3.0                                      | 45                        | 620                                   | (0.64, 0.35)              | 92.6                             |

<sup>a</sup>External quantum efficiency (EQE). <sup>b</sup>Maximum current efficiency (CE). <sup>c</sup>Maximum power efficiency (PE). <sup>d</sup>Full width at half maxima. <sup>e</sup>Peak wavelength. <sup>f</sup>The Commission Internationale de l'Eclairage color coordinates recorded at 10V. <sup>g</sup>Color purity calculated by Equation S1. <sup>i</sup>Not available since the HTL-free QLED with the neat QD film as the emitting layer wasn't working.

$$color\ purity = \frac{\sqrt{(x_s - x_i)^2 + (y_s - y_i)^2}}{\sqrt{(x_d - x_i)^2 + (y_d - y_i)^2}} \times 100\% \quad (1)$$

In Equation 1, the parameters  $(x_s, y_s)$  represent the color coordinates of the devices.  $(x_i, y_i)$  are the color coordinates of the 1931 CIE standard equal-energy point, i.e., (0.333, 0.333) used in this investigation.  $(x_d, y_d)$  refer to the color coordinates of the dominant wavelength[2,3].

Table S2. Comparison of the electroluminescent performances of the devices with different hosts.

| Host                | QD <sup>a</sup><br>(%) | EML <sup>b</sup><br>(nm) | EQE <sup>c</sup><br>(%) | CE <sup>d</sup><br>(cd/A) | PE <sup>e</sup><br>(lm/W) | FWHM <sup>f</sup><br>(nm) | $\lambda_{\max}$ <sup>g</sup><br>(nm) | CIE <sup>h</sup><br>(x,y) | Color<br>purity <sup>i</sup><br>(%) |
|---------------------|------------------------|--------------------------|-------------------------|---------------------------|---------------------------|---------------------------|---------------------------------------|---------------------------|-------------------------------------|
| DMAC-DPS            | 20                     | 40                       | 10.8                    | 16.3                      | 8.5                       | 32                        | 620                                   | (0.64,0.35)               | 87.6                                |
| m-ACSO <sub>2</sub> | 20                     | 40                       | 5.3                     | 7.6                       | 3.0                       | 32                        | 620                                   | (0.55,0.35)               | 76.2                                |
| mCP                 | 20                     | 40                       | 17.7                    | 25.6                      | 10.7                      | 32                        | 620                                   | (0.65,0.33)               | 97.0                                |
| mCP                 | 20                     | 30                       | 17.2                    | 26.6                      | 18.6                      | 30                        | 620                                   | (0.63,0.32)               | 88.9                                |
| mCP                 | 30                     | 30                       | 18.1                    | 29.2                      | 20.4                      | 30                        | 620                                   | (0.64,0.33)               | 91.1                                |

<sup>a</sup>Doping concentration of QD. <sup>b</sup>Thickness of the emitting layer. <sup>c</sup>External quantum efficiency (EQE). <sup>d</sup>Maximum current efficiency (CE). <sup>e</sup>Maximum power efficiency (PE). <sup>f</sup>Full width at half maxima. <sup>g</sup>Peak EL wavelength. <sup>h</sup>The Commission Internationale de l'Eclairage coordinates recorded at 10V. <sup>i</sup>Color purity calculated following Equation S1.

Table S3. The calculated photoluminescence properties of the doped QD films.

| mCP:PCzAQC0.5:QD <sup>a</sup> | $\Phi$<br>(%) <sup>b</sup> | $\Phi_p/\Phi_d$<br>(%) <sup>c</sup> | $\tau_p$<br>(ns) <sup>d</sup> | $\tau_d$<br>( $\mu$ s) <sup>e</sup> | $k_r^S$<br>( $10^7 \text{ s}^{-1}$ ) <sup>f</sup> | $k_{nr}^S$<br>( $10^7 \text{ s}^{-1}$ ) <sup>g</sup> |
|-------------------------------|----------------------------|-------------------------------------|-------------------------------|-------------------------------------|---------------------------------------------------|------------------------------------------------------|
| 70:0:30                       | 58                         | 58/-                                | 75.3                          | -                                   | 0.75                                              | 0.55                                                 |
| 70:30:0                       | 76                         | 40.0/36                             | 43.7                          | 2.01                                | 0.92                                              | 0.29                                                 |

<sup>a</sup>Weight ratio of the emitting layer. <sup>b</sup>Photoluminescence quantum yield (PLQY). <sup>c</sup>PLQY ratio of the prompt and delayed components, respectively. <sup>d</sup>Lifetime constant of the prompt fluorescence. <sup>e</sup>Lifetime constant of the delayed fluorescence. <sup>f</sup>Rate constant of radiative recombination decay. <sup>g</sup>Rate constant of non-radiative recombination decay.

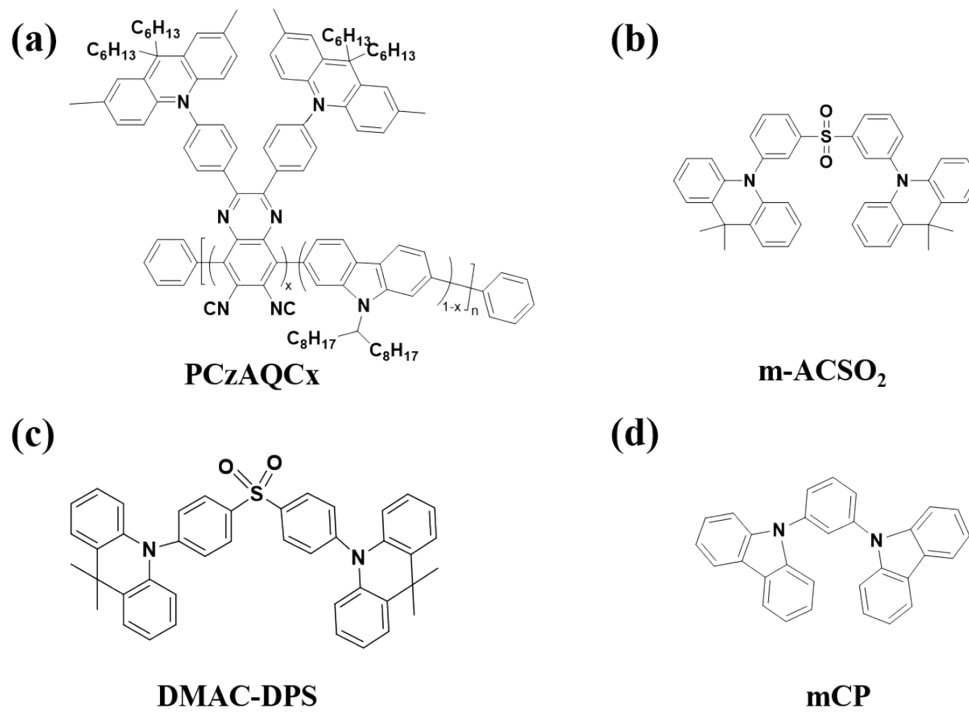

**Figure S1.** Chemical structures of the organic materials used in the emitting layers: (a) PCzAQC25, (b) m-ACSO<sub>2</sub>, (c) DMAC-DPS, and (d) mCP.

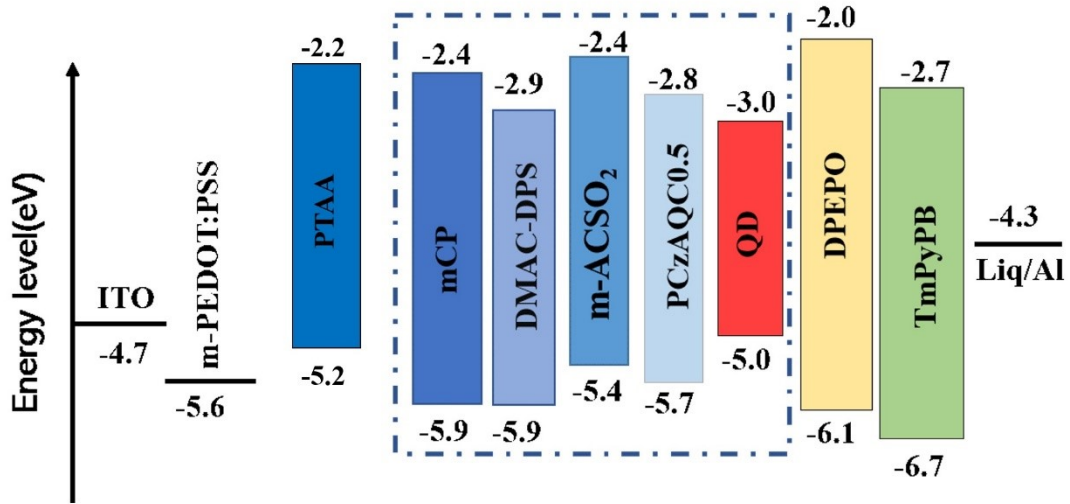

**Figure S2.** Schematic energy diagram of the prepared QLEDs.

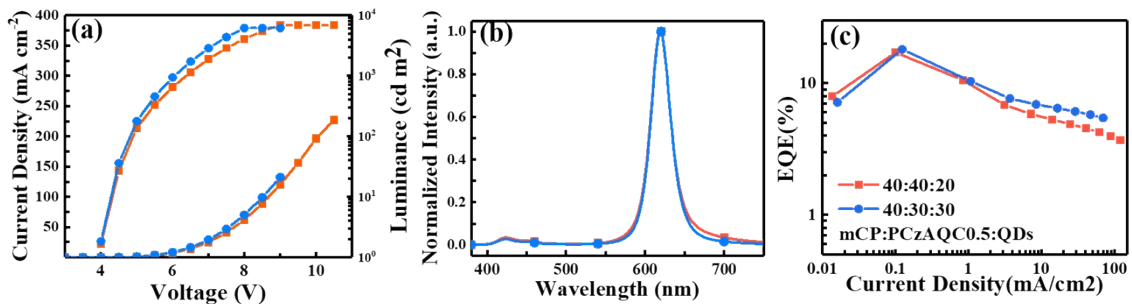

**Figure S3.** (a) Current density-luminance-voltage (J-L-V) characteristics, (b) current efficiency characteristics, and (c) EQE characteristics of QLEDs with different QD concentration.

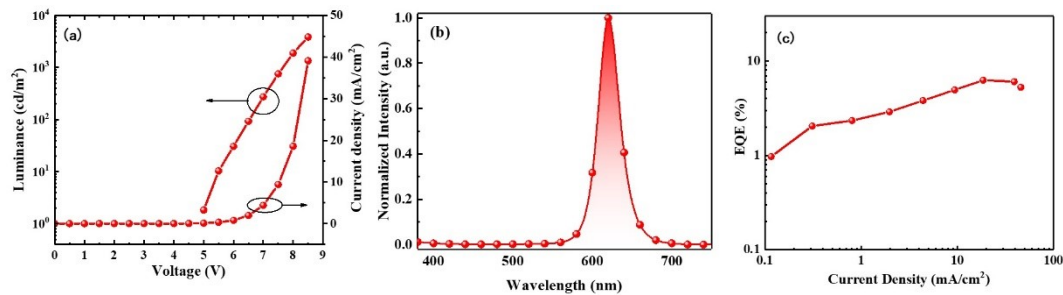

**Figure S4.** (a) Current density-luminance-voltage (J-L-V) characteristics, (b) current efficiency characteristics, and (c) EQE characteristics of the device with mCP:QD = 80:20 as the emitting layer.

- [1] T. Wang, K. Li, B. Yao, Y. Chen, H. Zhan, Z. Xie, G. Xie, X. Yi and Y. Cheng, *Advanced Functional Materials*, 2020, 30, 2002493.
- [2] Q. Wang, G. Zhu, Y. Li and Y. Wang, *Optical Materials* 2015; 42: 385-389.
- [3] T. Zhao, H. Liu, M. E. Ziffer, A. Rajagopal, L. Zuo, D. S. Ginger, X. Li and A. K. Y. Jen, *ACS Energy Letters* 2018; 3(7): 1662-1669.
